# Supplementary material for: Fabricating and characterising ZnO–ZnS–Ag2S ternary nanostructures with efficient solar-light photocatalytic activity
Source: Royal Society of Chemistry journal article supplement (doi:10.1039/c4cp02945c), 2014-08-21
Supplement: c4cp02945c1.pdf [file c4cp02945c1.pdf]

# Electronic Supplementary Information

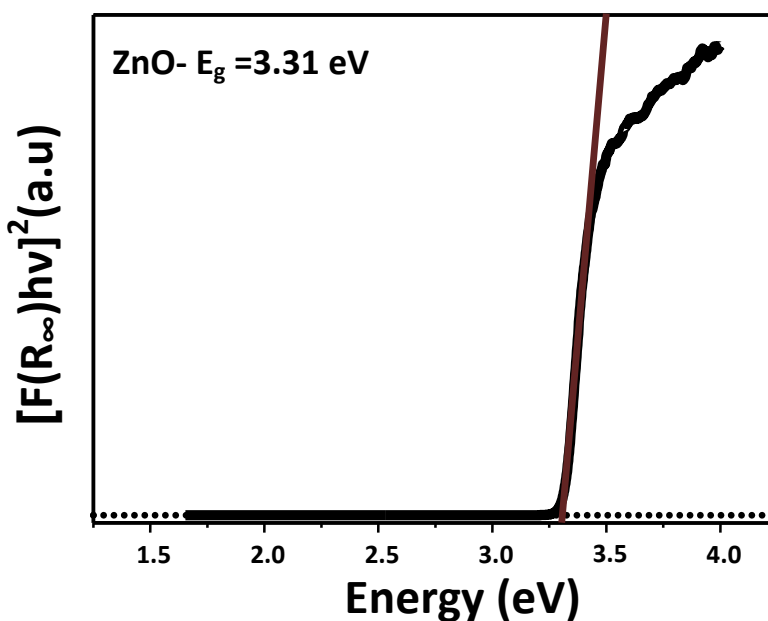

**Fig. S1** – Kubelka-Munk elaboration  $[F(R_\infty)hv]^2$  versus energy of pure ZnO, to show the optical  $E_g$  as calculated using the Tauc procedure. The dotted line represents the  $x$ -axis = 0, while the red continuous line the  $x$ -axis intercept of the line tangent to the inflection point of the samples, *i.e.* the optical  $E_g$ .

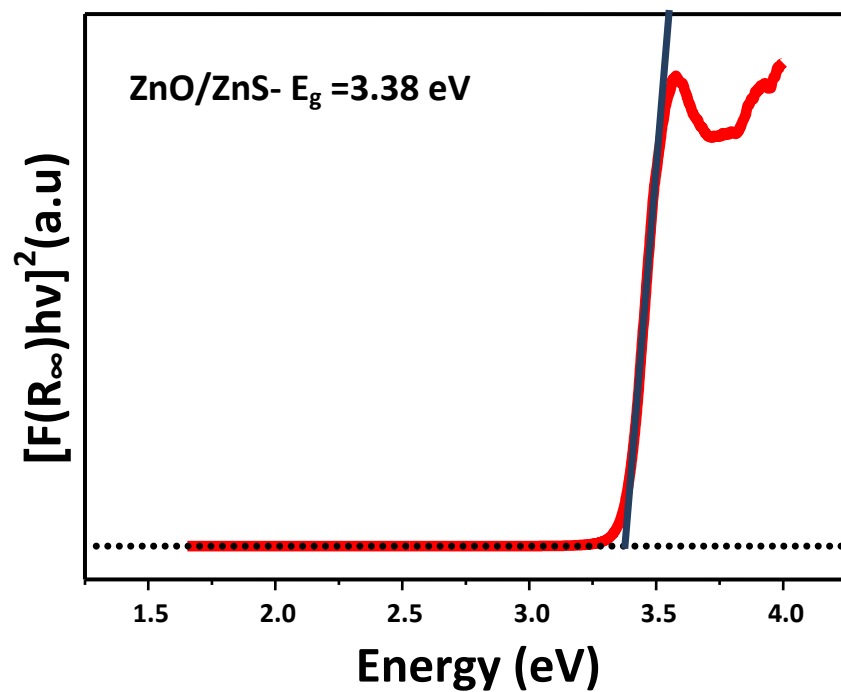

**Fig. S2** – Kubelka-Munk elaboration  $[F(R_\infty)hv]^2$  versus energy of ZnO/ZnS, to show the optical  $E_g$  as calculated using the Tauc procedure. The dotted line represents the  $x$ -axis = 0, while the red continuous line the  $x$ -axis intercept of the line tangent to the inflection point of the samples, *i.e.* the optical  $E_g$ .
